# Supplementary material for: Enhanced visible light photocatalytic activity of BiOI/BiOCOOH composites synthesized via ion exchange strategy
Source: Royal Society of Chemistry journal article supplement (doi:10.1039/c4ra10999f), 2014-12-22

## Electronic Supplementary Information (ESI) For

### Enhanced visible light photocatalytic activity of BiOI/BiOCCOOH composites synthesized *via* ion exchange strategy

Bo Chai\* and Xing Wang

**Fig. S1.** FTIR spectra of pure BiOCCOOH, BiOI and S3 sample.

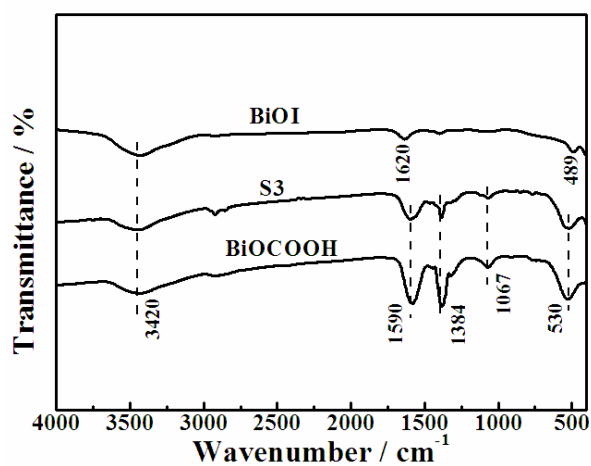

**Fig. S2.** Zeta potential plot of S3 sample at different pH value.

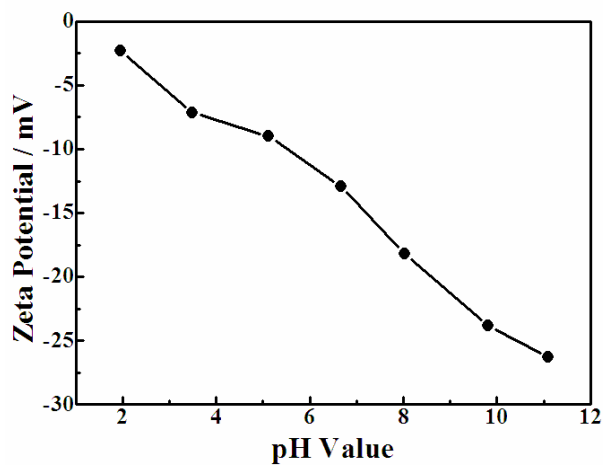

**Fig. S3.** Mott-Schottky plot for BiOCOOH electrode in the 0.1 mol L<sup>-1</sup> Na<sub>2</sub>SO<sub>4</sub> solution.

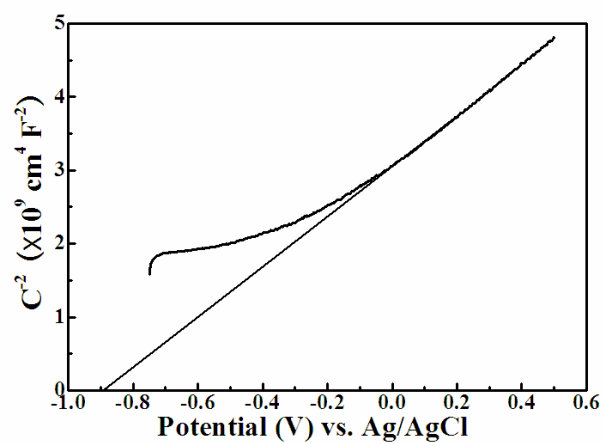

**Fig. S4.** Mott-Schottky plot for S3 electrode in the 0.1 mol L<sup>-1</sup> Na<sub>2</sub>SO<sub>4</sub> solution.

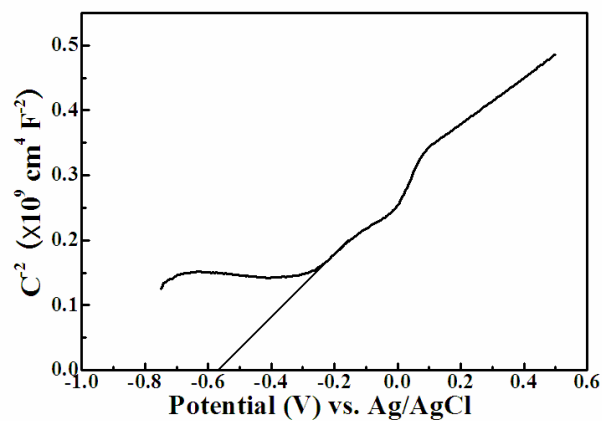

Supplement: c4ra10999f1.pdf [file c4ra10999f1.pdf]
